# Supplementary material for: TRPV4 modulates sperm motility, fertilization, and hatching rates in chub mackerel
Source: Research Square preprint supplement (doi:10.21203/rs.3.rs-8828910/v1), 2026-02-19
Supplement: Supplementary file 1 [file be2795019134c4f155310b22.docx]

TRPV4 modulates sperm motility, fertilization, and hatching rates in chub mackerel

Supplementary Information

**Supplementary Notes on Supplementary Videos**:

Supplementary Video S1 shows the first 30 s post-activation of chub mackerel sperm activated with seawater alone, serving as the control condition. Supplementary Videos S2–S5 show sperm activation in seawater supplemented with increasing concentrations of the TRPV4 agonist RN1747: 10 nM (S2), 100 nM (S3), 1 µM (S4), and 10 µM (S5). Supplementary Videos S6–S9 show sperm activation following exposure to seawater containing increasing concentrations of the TRPV4 antagonist RN1734: 10 nM (S6), 100 nM (S7), 1 µM (S8), and 10 µM (S9).

**
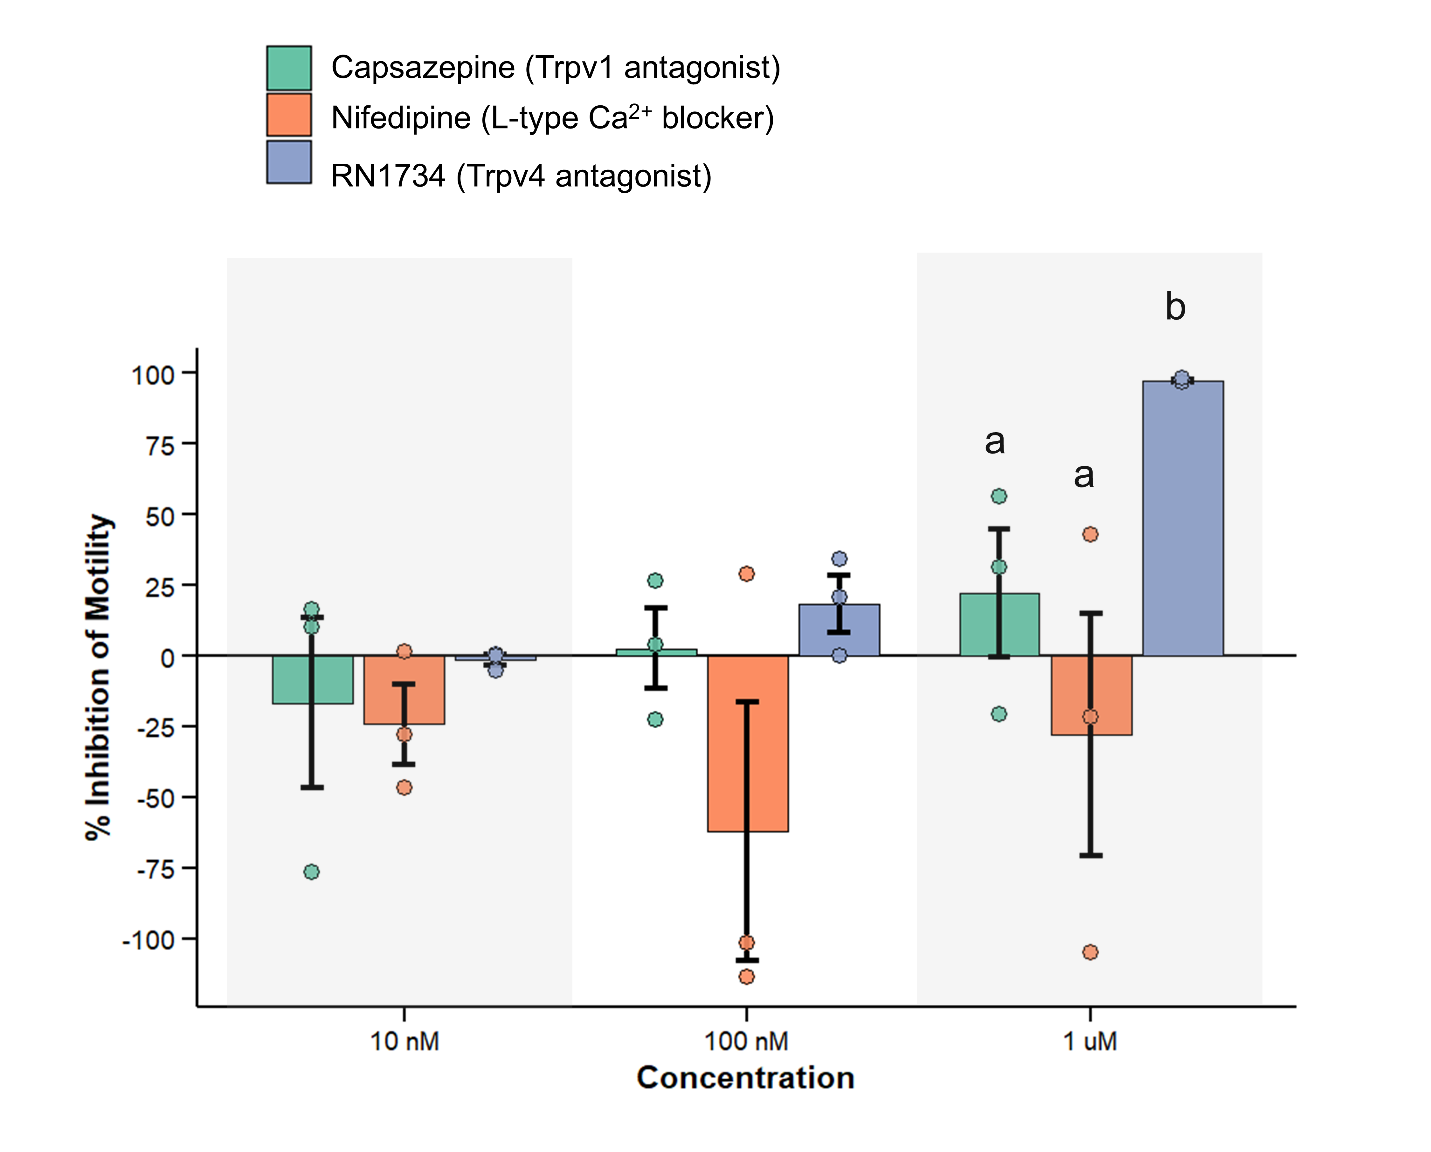
**

**Supplementary Figure 1.** Inhibition of sperm motility in chub mackerel by calcium channel and TRP antagonists. Effects of nifedipine (L-type Ca²⁺ channel blocker), capsazepine (TRPV1 antagonist), and RN1734 (TRPV4 antagonist) at 10 nM, 100 nM, and 1 µM compared with the control (seawater-activated sperm). Different letters indicate significant differences.


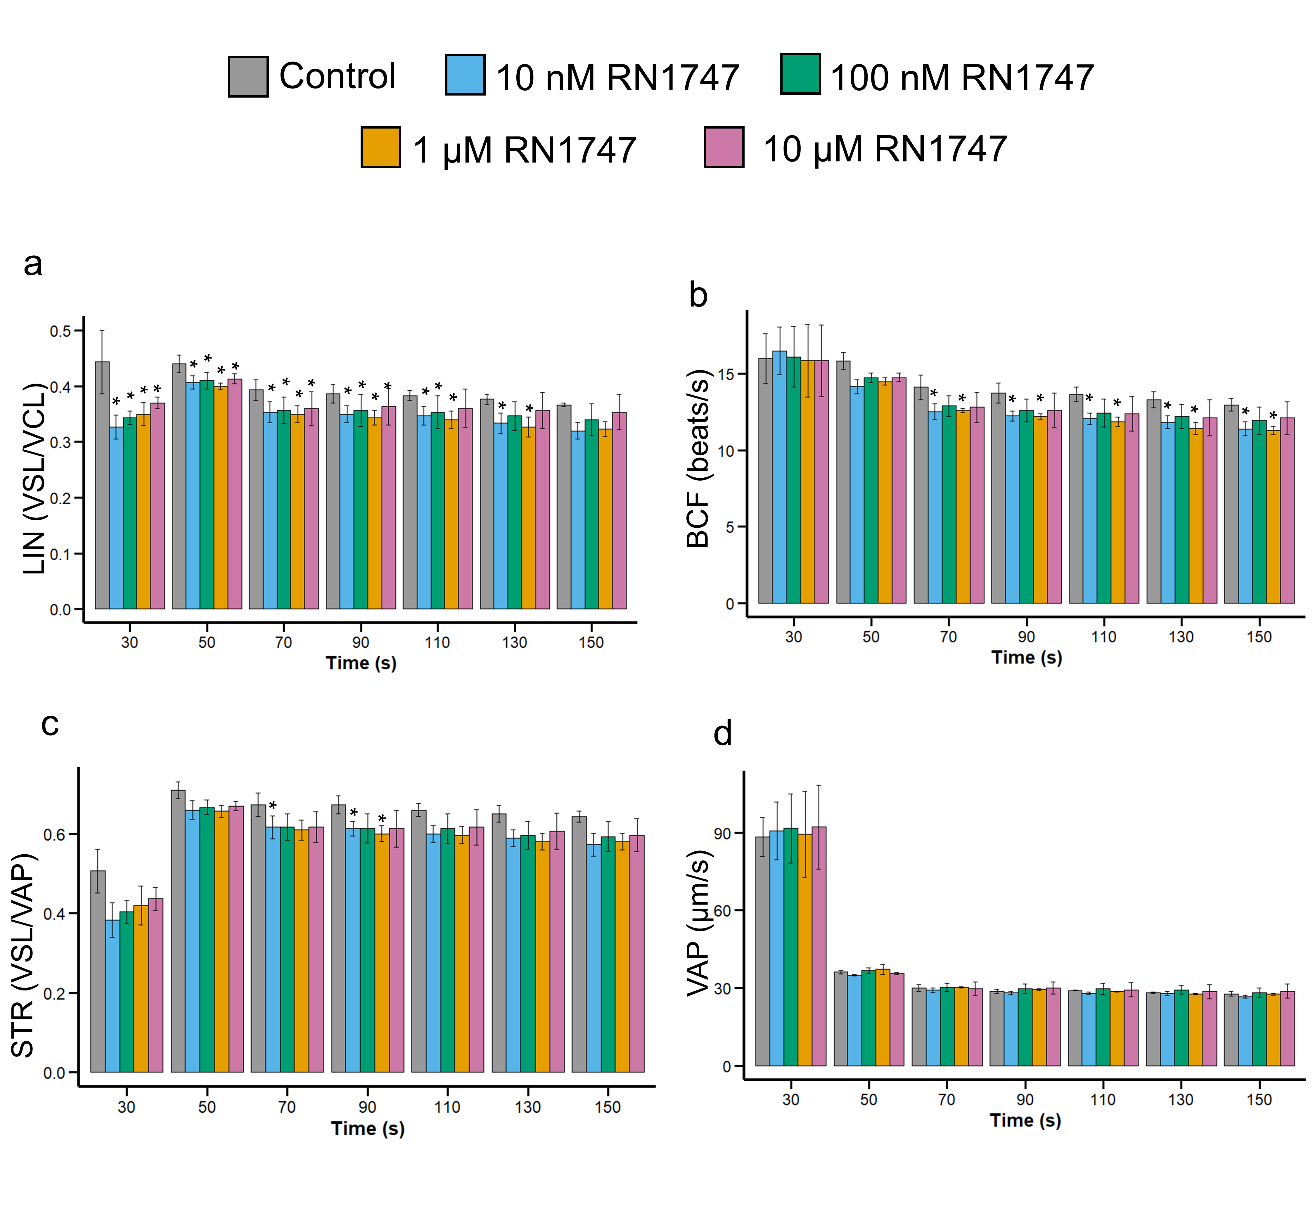
**Supplementary Figure 2.** Effects of TRPV4 activation on sperm motility and kinematics in chub mackerel. LIN, BCF, STR, and VAP (a–d) of sperm activated with seawater (control) or the TRPV4 agonist RN1747 (10 nM–10 µM) at different time points. Significant differences between treatments are indicated (*p*<0.05).

**Supplementary Figure 3.** Effects of TRPV4 inhibition on sperm motility and kinematics in chub mackerel. LIN, BCF, STR, and VAP (a–d) of sperm activated with seawater (Control) or the TRPV4 agonist RN1734 (10 nM–10 µM) at different time points. Significant differences between treatments are indicated (*p*<0.05).


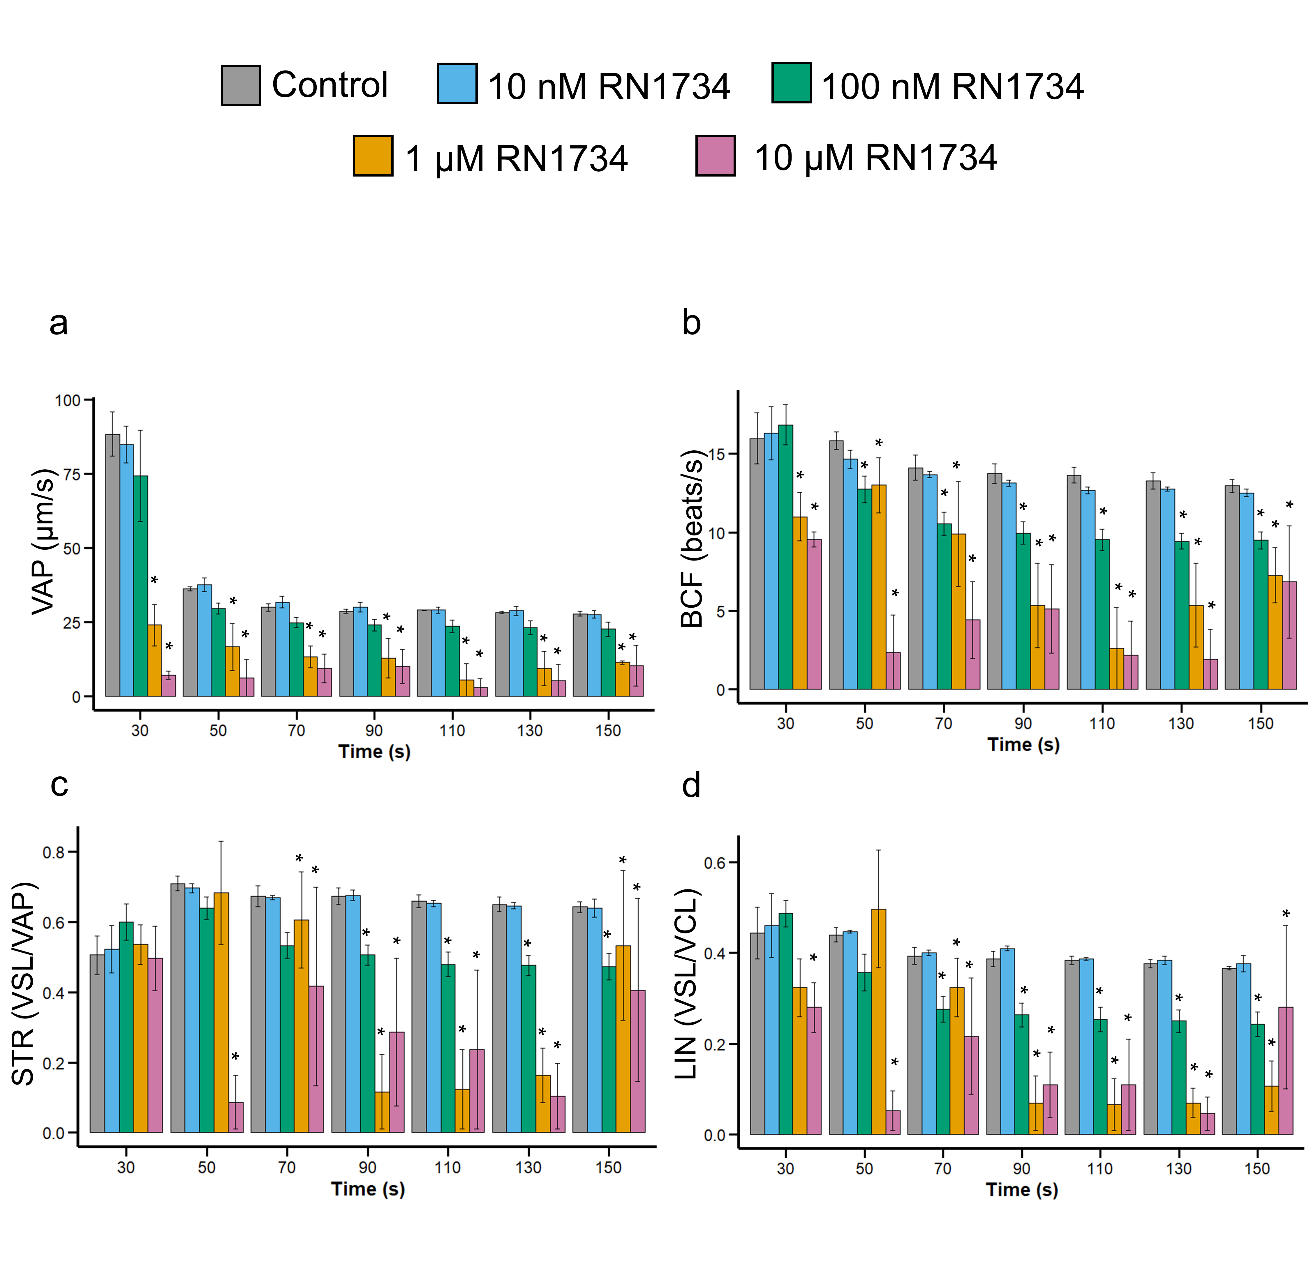

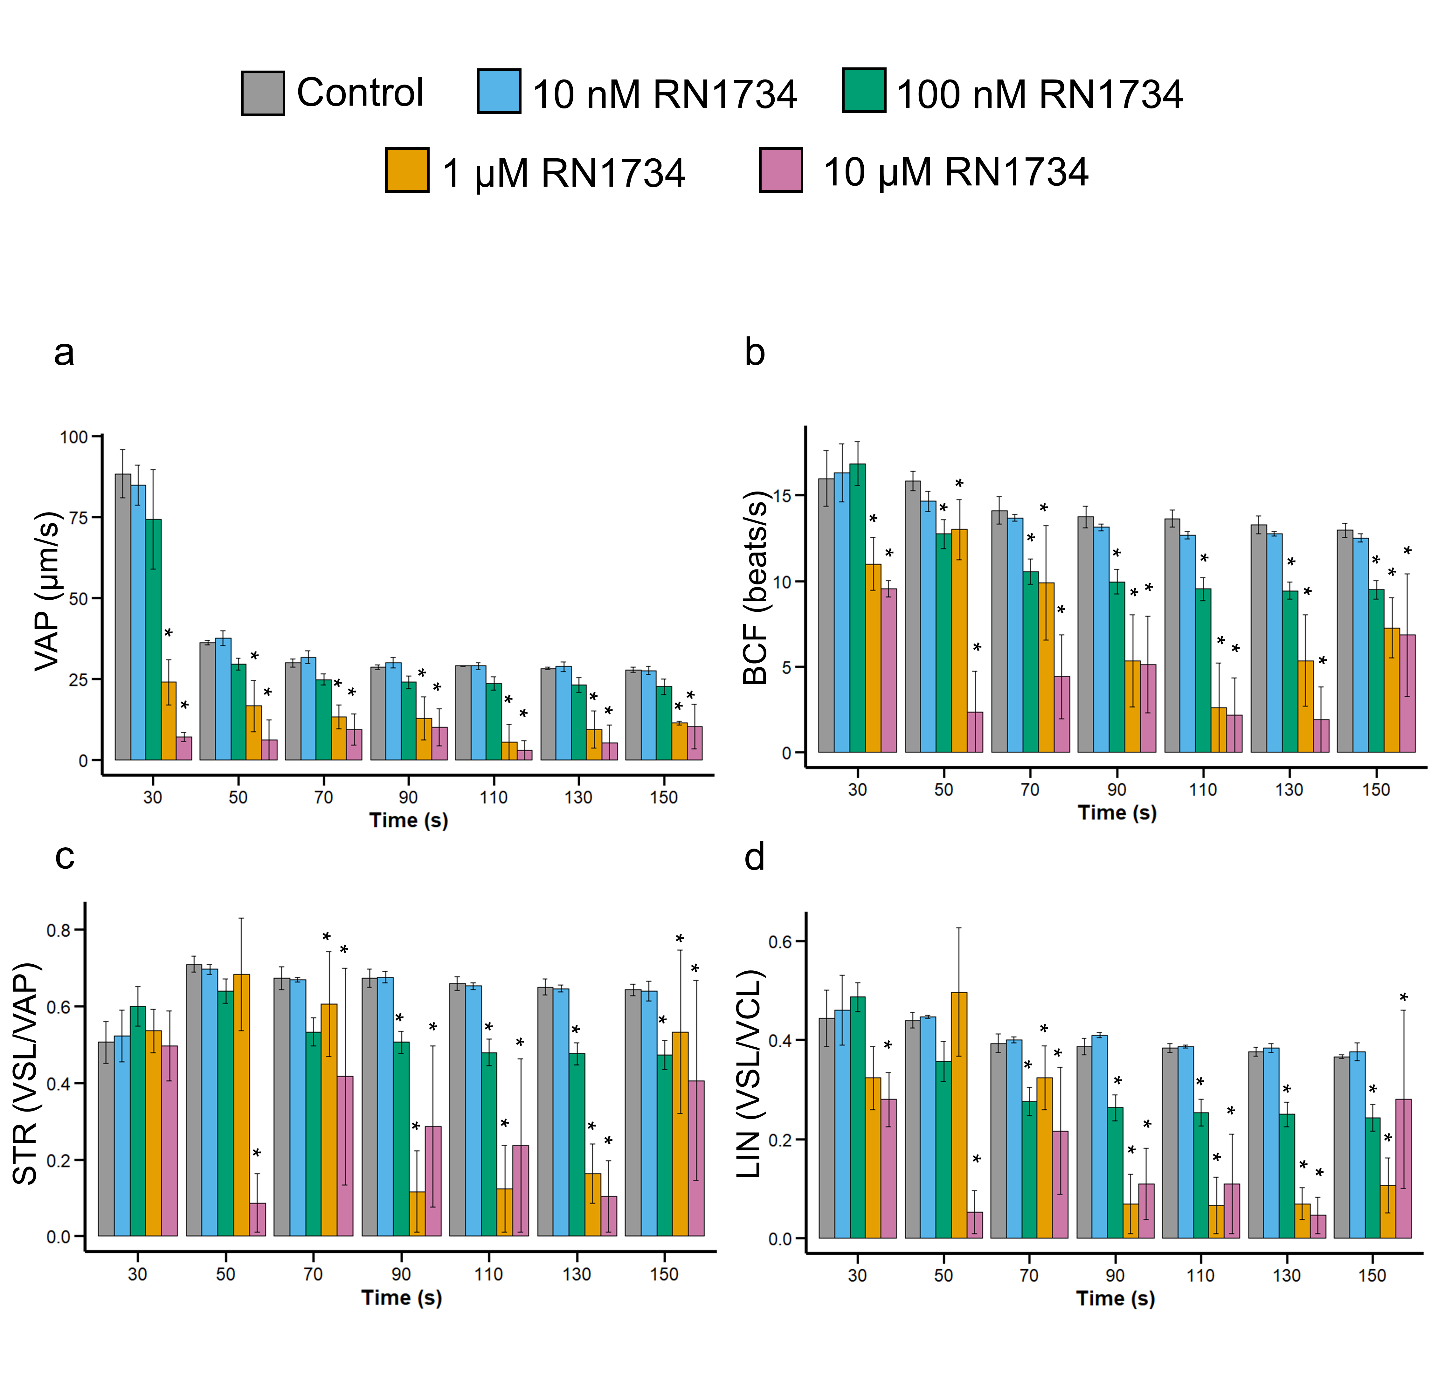


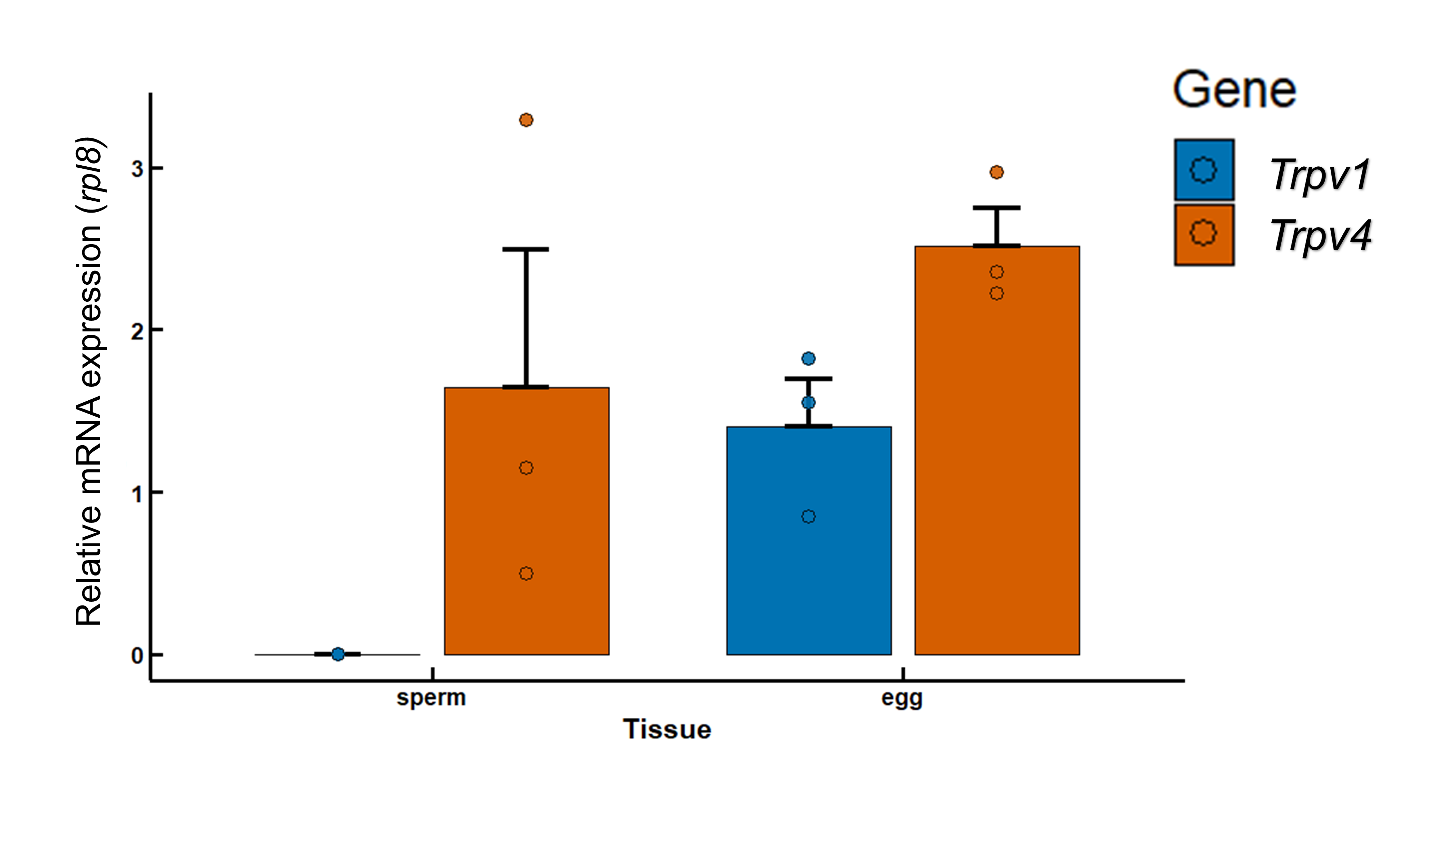


**Supplementary Figure 4.** Relative mRNA expression of Trpv1 and Trpv4 in chub mackerel sperm and eggs. Data represent mean ± SEM (n = 3 individuals per sex).

**
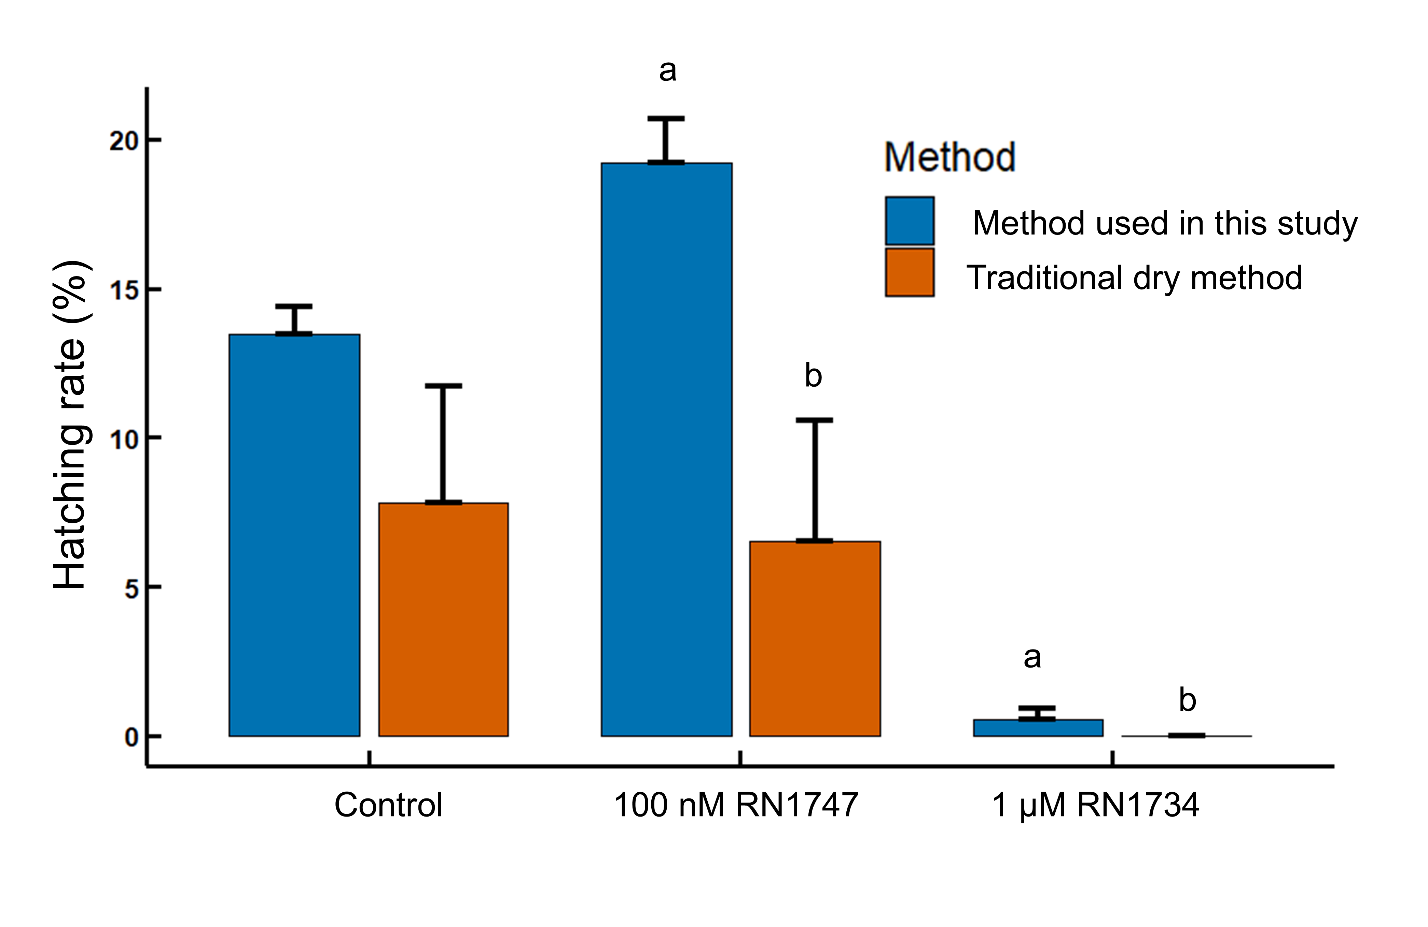
**

**Supplementary Figure 5.** Effects of different artificial insemination methods on hatching rates in chub mackerel. Hatching rates following sperm activation with seawater (control), 100 nM RN1747, or 1 µM RN1734. Different letters indicate significant differences among treatments (*p*<0.05).


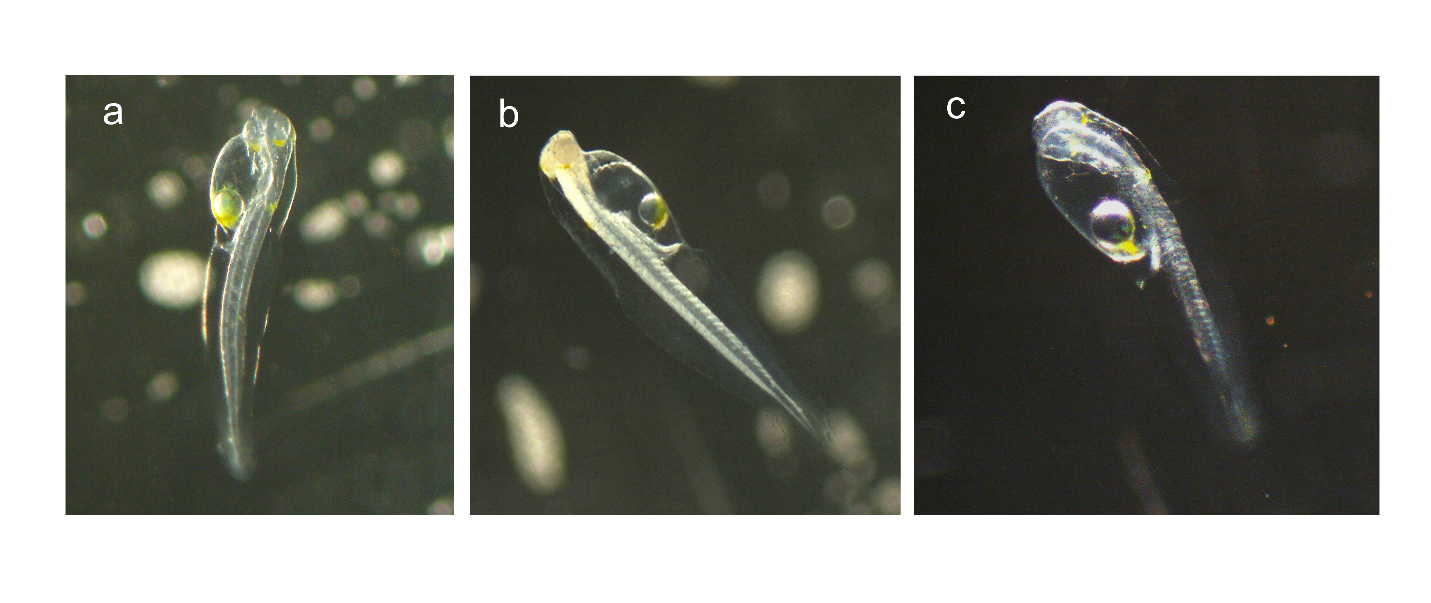
**Supplementary Figure 6.** Representative images of hatched larvae from artificial insemination. Larvae derived from sperm activated with seawater (control) (a), 100 nM RN1747 (b), and 1 µM RN1734 (c).

| **Table 1.** Accessioned sequences obtained from GenBank for phylogenetic reconstruction | | | | | |
| --- | --- | --- | --- | --- | --- |
| **GenBank accession** | **Common name** | **Scientific name** | **Class** | **Order** | **Family** |
| XM_042337715.1 | Elephant shark | *Callorhinchus milii* | Chondrichthyes | Chimaeriformes | Callorhinchidae |
| XM_053325225.1 | Chub mackerel | *Scomber japonicus* | Actinopterygii | Scombriformes | Scombridae |
| XM_003451734.5 | Nile tilapia | *Oreochromis niloticus* | Actinopterygii | Cichliformes | Cichlidae |
| XM_051423290.1 | European seabass | *Dicentrarchus labrax* | Actinopterygii | Acanthuriformes | Moronidae |
| XM_036213565.1 | Indian medaka | *Oryzias melastigma* | Actinopterygii | Beloniformes | Adrianichthyidae |
| XM_022757227.1 | Greater amberjack | *Seriola dumerili* | Actinopterygii | Carangiformes | Carangidae |
| XM_018669749.2 | Asian seabass | *Lates calcarifer* | Actinopterygii | Carangiformes | Latidae |
| XM_006640334.3 | spotted gar | *Lepisosteus oculatus* | Actinopterygii | Lepisosteiformes | Lepisosteidae |
| XM_059032940.1 | sterlet | *Acipenser ruthenus* | Actinopterygii | Acipenseriformes | Acipenseridae |
| XM_041936804.1 | Copperband butterflyfish | *Chelmon rostratus* | Actinopterygii | Acanthuriformes | Chaetodontidae |
| XM_015394367.1 | sheepshead minnow | *Cyprinodon variegatus* | Actinopterygii | Cyprinodontiformes | Cyprinodontidae |
| XM_042422511.1 | Southern bluefin tuna | *Thunnus maccoyii* | Actinopterygii | Scombriformes | Scombridae |
| XM_044371238.1 | Yellowfin tuna | *Thunnus albacares* | Actinopterygii | Scombriformes | Scombridae |
| XM_005999430.1 | Coelacanth | *Latimeria chalumnae* | Actinistia | Coelacanthiformes | Latimeriidae |
| XM_028703848.2 | Common wall lizard | *Podarcis muralis* | Reptilia | Squamata | Lacertidae |
| XM_065646310.1 | Nicobar pigeon | *Caloenas nicobarica* | Aves | Columbiformes | Columbidae |
| XM_037878785.2 | Green sea turtle | *Chelonia mydas* | Reptilia | Testudines | Cheloniidae |
| XM_006530432.2 | House mouse | *Mus musculus* | Mammalia | Rodentia | Muridae |
| NM_021625.5 | Human Trpv4 | *Homo sapiens* | Mammalia | Primates | Hominidae |

| **Table 2.** Sperm motility and kinematic parameters (mean ± SEM) obtained from computer-assisted sperm analysis (CASA) using RN1747-supplemented activating medium. | | | | | | |
| --- | --- | --- | --- | --- | --- | --- |
| **treatment** | **time** | **Motility** | **ALH** | **VCL** | **VSL** | **LIN** |
| Control | 30 | 87.72±1.7 | 0.86±0.05 | 97.18±5.6 | 41.36±7.31 | 0.44±0.06 |
| Control | 50 | 78.8±3.13 | 1.11±0.07 | 57.59±1.7 | 26.21±0.77 | 0.44±0.02 |
| Control | 70 | 73.33±4.15 | 1.1±0.06 | 51.72±2.13 | 21.09±1.43 | 0.39±0.02 |
| Control | 90 | 70.97±4.23 | 1.06±0.04 | 50.05±1.3 | 20.22±0.91 | 0.39±0.02 |
| Control | 110 | 69.87±4.75 | 1.12±0.03 | 50.85±0.28 | 20.18±0.48 | 0.38±0.01 |
| Control | 130 | 66.99±5.1 | 1.09±0.03 | 49.54±0.38 | 19.48±0.46 | 0.38±0.01 |
| Control | 150 | 65.77±5.76 | 1.1±0.04 | 48.97±0.71 | 18.73±0.09 | 0.37±0.01 |
| 10 nM RN1747 | 30 | 93.15±2.8 | 0.96±0.05 | 100.74±8.78 | 31.78±2.38 | 0.33±0.02 |
| 10 nM RN1747 | 50 | 84.13±4.22 | 1.19±0.04 | 56.71±0.88 | 23.75±0.68 | 0.41±0.01 |
| 10 nM RN1747 | 70 | 69.53±7.82 | 1.12±0.03 | 50.49±1.59 | 19.03±1.22 | 0.35±0.02 |
| 10 nM RN1747 | 90 | 65.55±8.85 | 1.13±0.03 | 49.43±1.12 | 18.36±1.01 | 0.35±0.02 |
| 10 nM RN1747 | 110 | 62.95±9.49 | 1.13±0.04 | 49.32±0.97 | 17.95±0.78 | 0.35±0.02 |
| 10 nM RN1747 | 130 | 59.85±10.78 | 1.15±0.01 | 49.84±0.7 | 17.48±0.9 | 0.33±0.02 |
| 10 nM RN1747 | 150 | 61.38±9.52 | 1.15±0.03 | 48.65±0.7 | 16.32±0.88 | 0.32±0.02 |
| 100 nM RN1747 | 30 | 93.58±3.39 | 1.08±0.11 | 102.18±11.3 | 34.31±5.09 | 0.34±0.01 |
| 100 nM RN1747 | 50 | 87.55±4.3 | 1.2±0.02 | 58.83±1.06 | 25.18±0.64 | 0.41±0.02 |
| 100 nM RN1747 | 70 | 72.15±7.85 | 1.13±0.01 | 51.91±1.54 | 20.01±1.53 | 0.36±0.02 |
| 100 nM RN1747 | 90 | 67.47±11.15 | 1.12±0.03 | 51.25±1.91 | 19.62±1.79 | 0.36±0.03 |
| 100 nM RN1747 | 110 | 64.43±12.93 | 1.18±0.05 | 51.66±2.06 | 19.29±2.08 | 0.35±0.03 |
| 100 nM RN1747 | 130 | 62.89±14.19 | 1.11±0.04 | 50.48±1.92 | 18.77±1.83 | 0.35±0.03 |
| 100 nM RN1747 | 150 | 62.79±15.82 | 1.15±0.03 | 49.9±2.26 | 17.95±1.96 | 0.34±0.03 |
| 1 µM RN1747 | 30 | 86.64±1.44 | 0.94±0.1 | 100.05±13.06 | 34.07±3.59 | 0.35±0.02 |
| 1 µM RN1747 | 50 | 77.75±2.61 | 1.19±0.03 | 59.35±1.75 | 24.65±0.68 | 0.4±0.01 |
| 1 µM RN1747 | 70 | 66.86±4.37 | 1.09±0.03 | 52.09±0.52 | 19.54±0.75 | 0.35±0.02 |
| 1 µM RN1747 | 90 | 63.45±6.02 | 1.14±0.04 | 51.74±0.71 | 18.77±0.3 | 0.34±0.01 |
| 1 µM RN1747 | 110 | 62.64±6.84 | 1.14±0.04 | 50.47±0.18 | 18.02±0.42 | 0.34±0.02 |
| 1 µM RN1747 | 130 | 60.66±6.29 | 1.09±0.01 | 49.52±0.68 | 17.35±0.43 | 0.33±0.02 |
| 1 µM RN1747 | 150 | 59.21±6.94 | 1.12±0.01 | 49.8±0.98 | 16.85±0.23 | 0.32±0.01 |
| 10 µM RN1747 | 30 | 88.62±3.17 | 0.94±0.07 | 102.42±12.86 | 37.37±5.33 | 0.37±0.01 |
| 10 µM RN1747 | 50 | 78.37±5.15 | 1.15±0.05 | 57.26±0.36 | 24.52±0.54 | 0.41±0.01 |
| 10 µM RN1747 | 70 | 64.74±7.64 | 1.14±0.05 | 50.95±3.43 | 19.8±2.41 | 0.36±0.03 |
| 10 µM RN1747 | 90 | 58.83±9.6 | 1.14±0.01 | 51.06±2.57 | 19.73±2.32 | 0.36±0.03 |
| 10 µM RN1747 | 110 | 56±10.57 | 1.15±0.05 | 50.29±3.34 | 19.29±2.84 | 0.36±0.03 |
| 10 µM RN1747 | 130 | 54.37±12.44 | 1.08±0.04 | 49.11±3.45 | 18.77±2.66 | 0.36±0.03 |
| 10 µM RN1747 | 150 | 53.41±13.08 | 1.12±0.02 | 49.19±3.68 | 18.58±2.64 | 0.35±0.03 |

| **Table 2.** cont. | | | | |
| --- | --- | --- | --- | --- |
| **treatment** | **time** | **STR** | **BCF** | **VAP** |
| Control | 30 | 0.51±0.05 | 15.98±1.62 | 88.44±7.5 |
| Control | 50 | 0.71±0.02 | 15.84±0.56 | 36.29±0.63 |
| Control | 70 | 0.67±0.03 | 14.11±0.8 | 30.07±1.26 |
| Control | 90 | 0.67±0.02 | 13.73±0.64 | 28.74±0.75 |
| Control | 110 | 0.66±0.02 | 13.64±0.49 | 29.09±0.14 |
| Control | 130 | 0.65±0.02 | 13.29±0.51 | 28.36±0.28 |
| Control | 150 | 0.64±0.01 | 12.96±0.42 | 27.87±0.82 |
| 10 nM RN1747 | 30 | 0.38±0.04 | 16.49±1.54 | 90.63±11.12 |
| 10 nM RN1747 | 50 | 0.66±0.02 | 14.15±0.45 | 35.07±0.2 |
| 10 nM RN1747 | 70 | 0.62±0.03 | 12.52±0.51 | 29.24±0.96 |
| 10 nM RN1747 | 90 | 0.61±0.02 | 12.23±0.34 | 28.17±0.75 |
| 10 nM RN1747 | 110 | 0.6±0.02 | 12.06±0.36 | 28.01±0.52 |
| 10 nM RN1747 | 130 | 0.59±0.02 | 11.83±0.4 | 27.98±0.78 |
| 10 nM RN1747 | 150 | 0.57±0.03 | 11.39±0.45 | 26.82±0.53 |
| 100 nM RN1747 | 30 | 0.4±0.03 | 16.1±2.0 | 91.68±13.35 |
| 100 nM RN1747 | 50 | 0.67±0.02 | 14.74±0.32 | 36.8±1.0 |
| 100 nM RN1747 | 70 | 0.62±0.03 | 12.9±0.68 | 30.32±1.52 |
| 100 nM RN1747 | 90 | 0.61±0.04 | 12.58±0.74 | 29.75±1.81 |
| 100 nM RN1747 | 110 | 0.61±0.04 | 12.43±0.92 | 29.73±2.2 |
| 100 nM RN1747 | 130 | 0.6±0.04 | 12.2±0.78 | 29.41±1.74 |
| 100 nM RN1747 | 150 | 0.59±0.04 | 11.93±0.88 | 28.29±1.83 |
| 1 µM RN1747 | 30 | 0.42±0.05 | 15.84±2.37 | 89.31±16.57 |
| 1 µM RN1747 | 50 | 0.66±0.01 | 14.49±0.25 | 37.33±1.92 |
| 1 µM RN1747 | 70 | 0.61±0.03 | 12.59±0.14 | 30.36±0.32 |
| 1 µM RN1747 | 90 | 0.6±0.02 | 12.2±0.2 | 29.51±0.4 |
| 1 µM RN1747 | 110 | 0.6±0.02 | 11.85±0.3 | 28.72±0.14 |
| 1 µM RN1747 | 130 | 0.58±0.02 | 11.43±0.41 | 27.81±0.21 |
| 1 µM RN1747 | 150 | 0.58±0.02 | 11.3±0.27 | 27.68±0.46 |
| 10 µM RN1747 | 30 | 0.44±0.03 | 15.86±2.33 | 92.12±16.14 |
| 10 µM RN1747 | 50 | 0.67±0.01 | 14.75±0.3 | 35.67±0.49 |
| 10 µM RN1747 | 70 | 0.62±0.04 | 12.8±0.98 | 29.84±2.6 |
| 10 µM RN1747 | 90 | 0.61±0.05 | 12.59±1.12 | 30.03±2.3 |
| 10 µM RN1747 | 110 | 0.62±0.04 | 12.38±1.13 | 29.37±2.72 |
| 10 µM RN1747 | 130 | 0.61±0.04 | 12.13±1.17 | 28.7±2.77 |
| 10 µM RN1747 | 150 | 0.6±0.04 | 12.11±1.07 | 28.91±2.74 |

| **Table 3.** Sperm motility and kinematic parameters (mean ± SEM) obtained from computer-assisted sperm analysis (CASA) using RN1734-supplemented activating medium. | | | | | | |
| --- | --- | --- | --- | --- | --- | --- |
| **treatment** | **time** | **Motility** | **ALH** | **VCL** | **VSL** | **LIN** |
| Control | 30 | 87.72±1.7 | 0.86±0.05 | 97.18±5.6 | 41.36±7.31 | 0.44±0.06 |
| Control | 50 | 78.8±3.13 | 1.11±0.07 | 57.59±1.53 | 26.21±0.77 | 0.44±0.02 |
| Control | 70 | 73.33±4.15 | 1.1±0.06 | 51.72±2.13 | 21.09±1.43 | 0.39±0.02 |
| Control | 90 | 70.97±4.23 | 1.06±0.04 | 50.05±1.3 | 20.22±0.91 | 0.39±0.02 |
| Control | 110 | 69.87±4.75 | 1.12±0.03 | 50.85±0.28 | 20.18±0.48 | 0.38±0.01 |
| Control | 130 | 66.99±5.1 | 1.09±0.03 | 49.54±0.38 | 19.48±0.46 | 0.38±0.01 |
| Control | 150 | 65.77±5.76 | 1.1±0.04 | 48.97±0.71 | 18.73±0.09 | 0.37±0.01 |
| 10 nM RN1734 | 30 | 81.78±8.14 | 0.87±0.13 | 94.45±3.12 | 41.96±8.84 | 0.46±0.07 |
| 10 nM RN1734 | 50 | 77.97±9.73 | 1.08±0.09 | 57.76±3.32 | 26.99±1.15 | 0.45±0.01 |
| 10 nM RN1734 | 70 | 71.64±12.44 | 1.08±0.1 | 52.14±3.02 | 22.36±0.97 | 0.4±0.01 |
| 10 nM RN1734 | 90 | 70.02±13.28 | 1.05±0.06 | 50.8±1.99 | 21.07±0.76 | 0.41±0.01 |
| 10 nM RN1734 | 110 | 70.09±12.17 | 1.07±0.06 | 49.59±1.76 | 20.09±0.46 | 0.39±0.01 |
| 10 nM RN1734 | 130 | 67.42±14.05 | 1.04±0.08 | 49.11±2.59 | 19.69±0.7 | 0.38±0.01 |
| 10 nM RN1734 | 150 | 68.22±14.49 | 1.05±0.07 | 48.13±2.19 | 18.8±1.1 | 0.38±0.02 |
| 100 nM RN1734 | 30 | 90.18±3.14 | 0.96±0.16 | 87.44±10.47 | 41.69±7.44 | 0.49±0.03 |
| 100 nM RN1734 | 50 | 82.33±7.08 | 1.19±0.1 | 53.66±1.87 | 19.91±2.32 | 0.36±0.04 |
| 100 nM RN1734 | 70 | 72.01±10.83 | 1.11±0.07 | 48.5±2.29 | 14.21±1.93 | 0.28±0.03 |
| 100 nM RN1734 | 90 | 66.89±11.42 | 1.11±0.1 | 47.15±2.8 | 13.22±1.74 | 0.26±0.03 |
| 100 nM RN1734 | 110 | 63.83±12.26 | 1.09±0.09 | 45.65±3.31 | 12.5±1.73 | 0.25±0.03 |
| 100 nM RN1734 | 130 | 60.46±13.93 | 1.07±0.1 | 45.05±3.26 | 12.15±1.64 | 0.25±0.03 |
| 100 nM RN1734 | 150 | 58.05±13.9 | 1.04±0.1 | 44.28±3.37 | 11.43±1.87 | 0.24±0.03 |
| 1 µM RN1734 | 30 | 33.57±14.03 | 0.94±0.07 | 39.47±7.24 | 14.5±5.79 | 0.32±0.06 |
| 1 µM RN1734 | 50 | 3.54±0.49 | 1.1±0.75 | 28.31±10.71 | 12.6±7.41 | 0.5±0.13 |
| 1 µM RN1734 | 70 | 2.91±0.38 | 1.66±0.72 | 31.52±8.05 | 5.61±0.06 | 0.32±0.06 |
| 1 µM RN1734 | 90 | 1.81±0.21 | 2.67±1.48 | 68.43±44.48 | 1.09±1 | 0.07±0.06 |
| 1 µM RN1734 | 110 | 2.37±0.78 | 1±0.1 | 16.01±16 | 1.39±1.38 | 0.07±0.06 |
| 1 µM RN1734 | 130 | 2.46±0.64 | 2.41±1.21 | 31.22±18.84 | 2.15±1.07 | 0.07±0.03 |
| 1 µM RN1734 | 150 | 2.03±0.14 | 1.98±1.03 | 24.72±7.11 | 5.61±2.21 | 0.11±0.05 |
| 10 µM RN1734 | 30 | 9.65±4.57 | 0.44±0.06 | 13.82±2.73 | 3.03±0.24 | 0.28±0.06 |
| 10 µM RN1734 | 50 | 3.12±0.53 | 1.23±1.23 | 15.44±15.43 | 1.35±1.34 | 0.05±0.04 |
| 10 µM RN1734 | 70 | 2.63±0.2 | 1.22±0.92 | 29.97±18.17 | 4.79±3.8 | 0.22±0.13 |
| 10 µM RN1734 | 90 | 2.23±0.54 | 1.39±0.81 | 24.35±12.65 | 4.2±2.65 | 0.11±0.07 |
| 10 µM RN1734 | 110 | 1.54±0.62 | 1.51±1.51 | 6.67±6.66 | 2.06±2.05 | 0.11±0.1 |
| 10 µM RN1734 | 130 | 1.64±0.4 | 1.17±1.17 | 12.13±12.12 | 1.52±1.51 | 0.05±0.04 |
| 10 µM RN1734 | 150 | 1.88±0.4 | 0.96±0.91 | 22.73±17.47 | 3.26±2 | 0.28±0.18 |

| **Table 3.** cont. | | | | |
| --- | --- | --- | --- | --- |
| **treatment** | **time** | **str_mean** | **bcf_mean** | **vap_mean** |
| Control | 30 | 0.51±0.05 | 15.98±1.62 | 88.44±7.5 |
| Control | 50 | 0.71±0.02 | 15.84±0.56 | 36.29±0.63 |
| Control | 70 | 0.67±0.03 | 14.11±0.8 | 30.07±1.26 |
| Control | 90 | 0.67±0.02 | 13.73±0.64 | 28.74±0.75 |
| Control | 110 | 0.66±0.02 | 13.64±0.49 | 29.09±0.14 |
| Control | 130 | 0.65±0.02 | 13.29±0.51 | 28.36±0.28 |
| Control | 150 | 0.64±0.01 | 12.96±0.42 | 27.87±0.82 |
| 10 nM RN1734 | 30 | 0.52±0.07 | 16.32±1.7 | 84.98±6.17 |
| 10 nM RN1734 | 50 | 0.7±0.01 | 14.65±0.59 | 37.8±2.29 |
| 10 nM RN1734 | 70 | 0.67±0.01 | 13.68±0.19 | 31.83±1.85 |
| 10 nM RN1734 | 90 | 0.68±0.01 | 13.13±0.19 | 30.21±1.62 |
| 10 nM RN1734 | 110 | 0.65±0.01 | 12.68±0.21 | 29.1±0.95 |
| 10 nM RN1734 | 130 | 0.65±0.01 | 12.76±0.13 | 28.89±1.47 |
| 10 nM RN1734 | 150 | 0.64±0.03 | 12.51±0.25 | 27.68±1.27 |
| 100 nM RN1734 | 30 | 0.6±0.05 | 16.84±1.28 | 74.39±15.34 |
| 100 nM RN1734 | 50 | 0.64±0.03 | 12.74±0.84 | 29.66±1.92 |
| 100 nM RN1734 | 70 | 0.53±0.04 | 10.55±0.75 | 24.91±1.76 |
| 100 nM RN1734 | 90 | 0.51±0.03 | 9.95±0.7 | 24.08±1.93 |
| 100 nM RN1734 | 110 | 0.48±0.04 | 9.53±0.66 | 23.74±2.09 |
| 100 nM RN1734 | 130 | 0.48±0.03 | 9.43±0.5 | 23.17±2.28 |
| 100 nM RN1734 | 150 | 0.47±0.04 | 9.5±0.54 | 22.67±2.4 |
| 1 µM RN1734 | 30 | 0.54±0.06 | 10.99±1.54 | 24.09±6.98 |
| 1 µM RN1734 | 50 | 0.68±0.15 | 13±1.75 | 16.78±7.91 |
| 1 µM RN1734 | 70 | 0.61±0.14 | 9.89±3.32 | 13.4±3.64 |
| 1 µM RN1734 | 90 | 0.12±0.11 | 5.36±2.69 | 12.96±6.72 |
| 1 µM RN1734 | 110 | 0.12±0.11 | 2.61±2.6 | 5.52±5.51 |
| 1 µM RN1734 | 130 | 0.16±0.08 | 5.35±2.67 | 9.51±5.77 |
| 1 µM RN1734 | 150 | 0.53±0.21 | 7.27±1.77 | 11.45±0.5 |
| 10 µM RN1734 | 30 | 0.5±0.09 | 9.54±0.46 | 7.27±1.39 |
| 10 µM RN1734 | 50 | 0.09±0.08 | 2.37±2.36 | 6.22±6.21 |
| 10 µM RN1734 | 70 | 0.42±0.28 | 4.43±2.45 | 9.55±4.85 |
| 10 µM RN1734 | 90 | 0.29±0.21 | 5.12±2.82 | 10.16±5.72 |
| 10 µM RN1734 | 110 | 0.24±0.23 | 2.17±2.16 | 3.01±3 |
| 10 µM RN1734 | 130 | 0.1±0.09 | 1.91±1.9 | 5.44±5.43 |
| 10 µM RN1734 | 150 | 0.41±0.26 | 6.84±3.59 | 10.41±6.94 |
